# Supplementary material for: A stable mixed-valent uranium(v,vi) organic framework as a fluorescence thermometer
Source: Royal Society of Chemistry journal article supplement (doi:10.1039/d1qi00580d), 2021-01-01
Supplement: d1qi00580d2.pdf [file d1qi00580d2.pdf]

## Supporting Information

### **A Mixed-Valent Uranium(V, VI) Organic Framework as a Fluorescence Thermometer**

Dongxu Gu, Weiting Yang,\* Huiping Chen, Yonghang, Yang, Xudong Qin, Lu Chen, Song Wang,\*  
Qinhe Pan\*

\*Corresponding author. Email: yangwt@hainanu.edu.cn; wangsong1984@126.com; panqinhe@163.com;

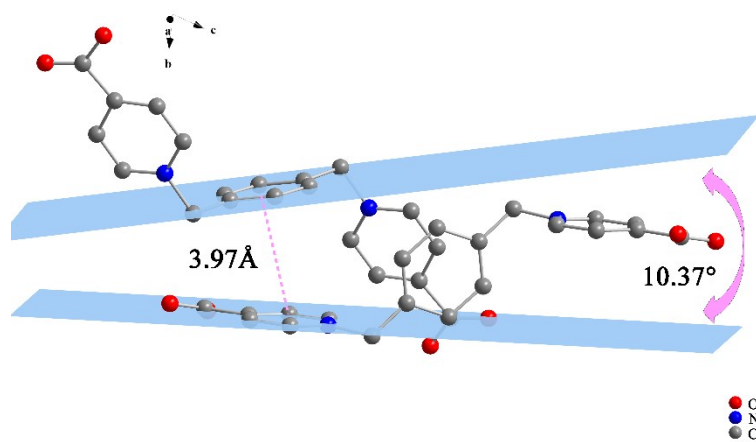

Figure S1  $\pi$ - $\pi$  stacking interaction in **HNU-46**. Removal of U and H atoms for easy observation.

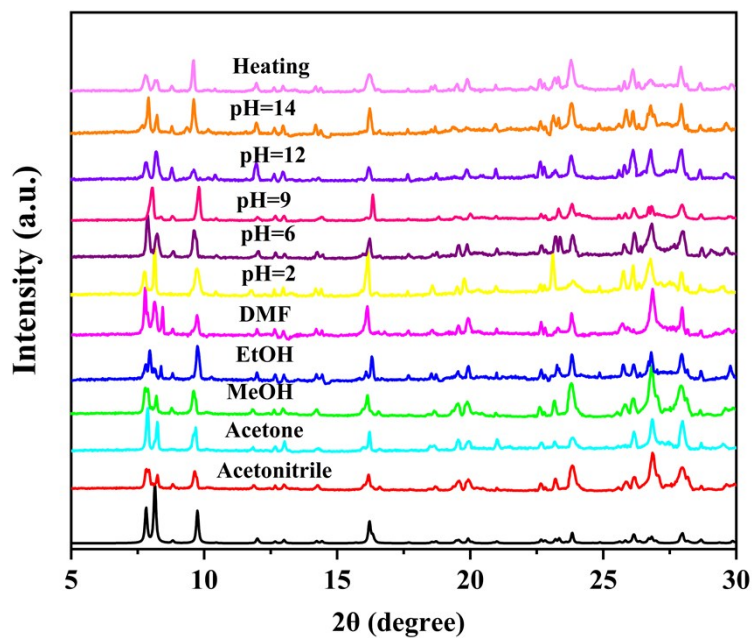

Figure S2 PXRD patterns after immersing **HNU-46** in different solvents for 12h.

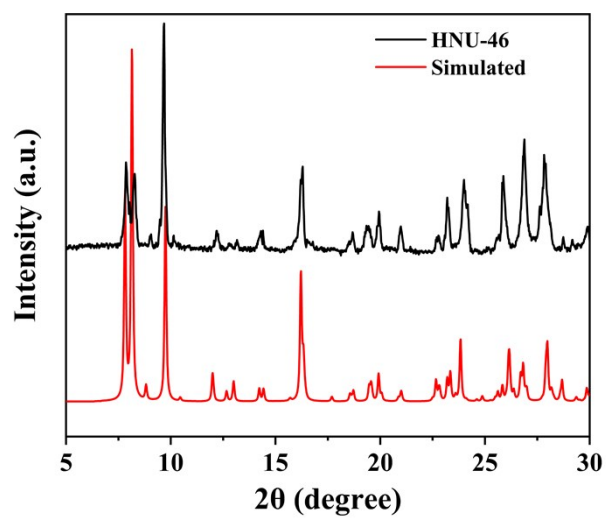

Figure S3 PXR D patterns of synthesized **HNU-46** after one year of storage under air.

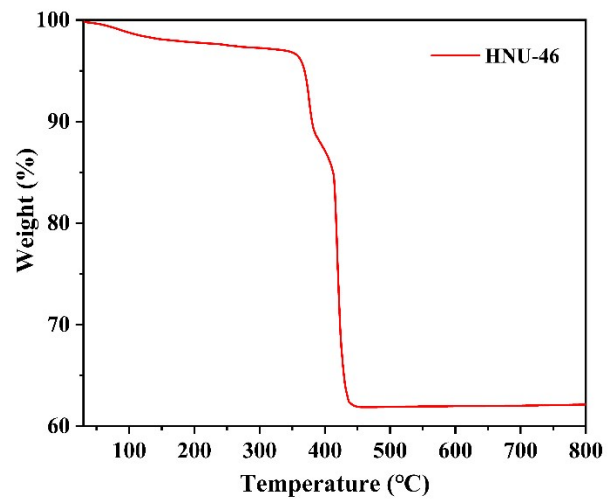

Figure S4 TGA curve of as-synthesized **HNU-46** in air.

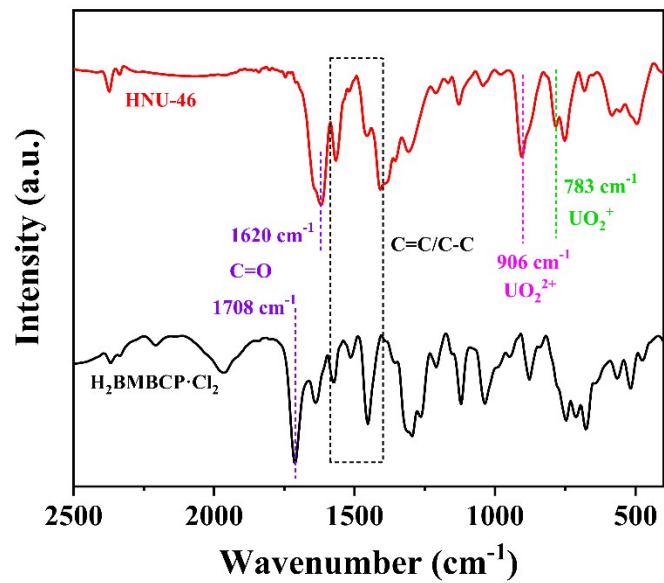

Figure S5 Infrared (IR) spectra of **HNU-46** and **H<sub>2</sub>BMBCP·Cl<sub>2</sub>** ligand.

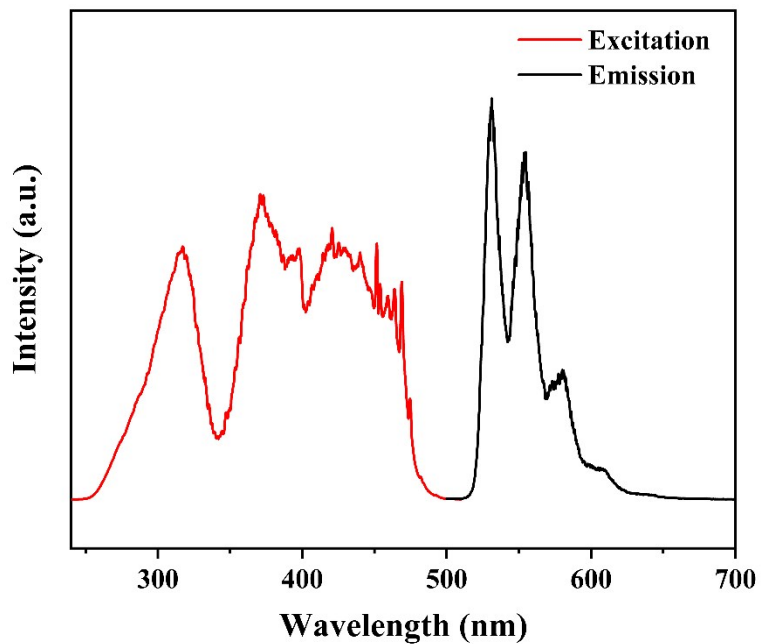

Figure S6 Solid-state excitation and emission spectra of **HNU-46** at 77 K ( $\lambda_{em} = 530$  nm,  $\lambda_{ex} = 370$  nm).

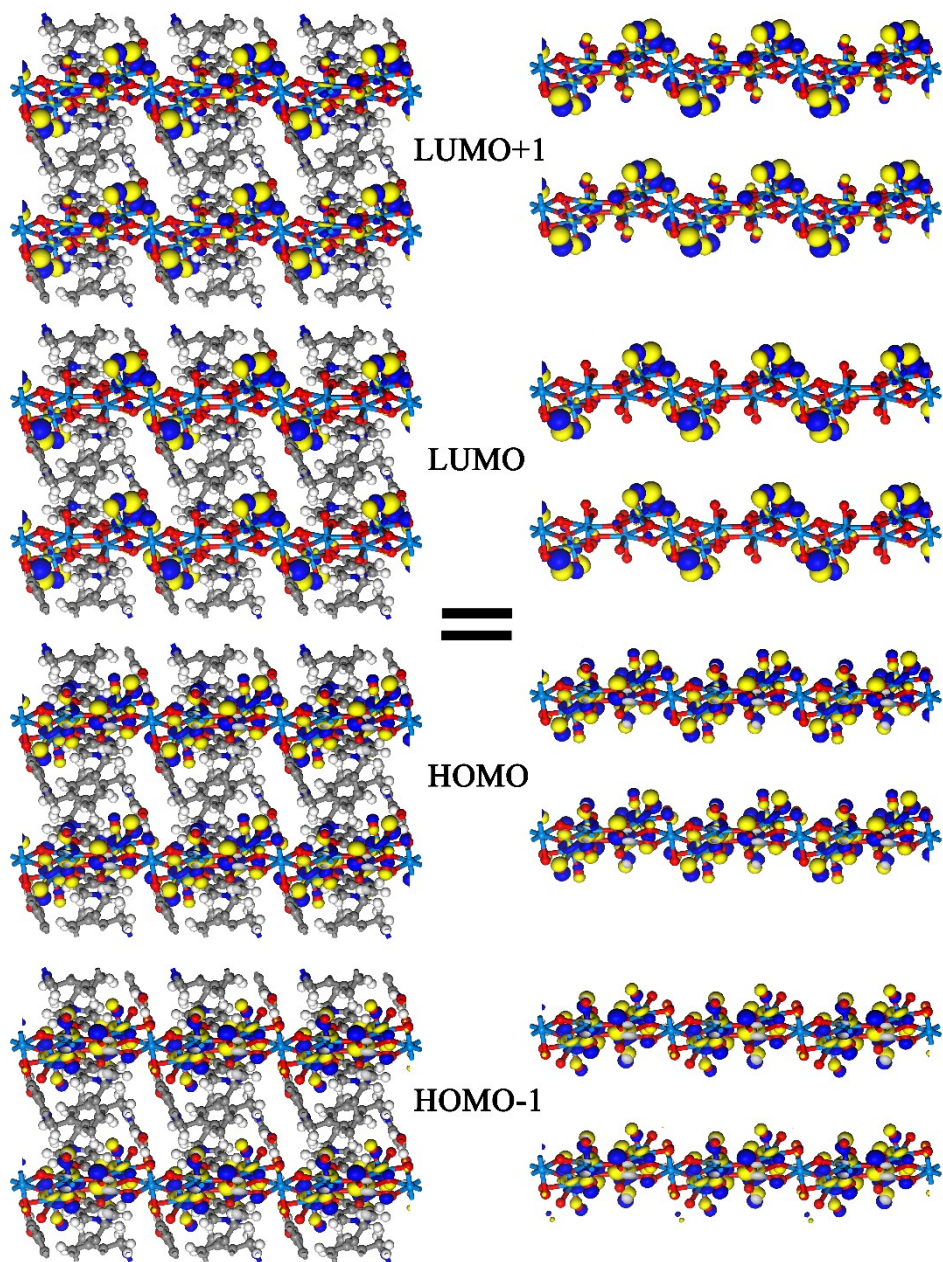

Figure S7 Frontier orbital of **HNU-46** (left) with ligands removed for easier viewing (right).



Table S1 Crystallographic data of **HNU-46**

| Complex                                                        | <b>HNU-46</b>              |
|----------------------------------------------------------------|----------------------------|
| Formula                                                        | $C_{40}H_{32}N_4O_{26}U_5$ |
| <i>Mr</i>                                                      | 2174.85                    |
| Crystal system                                                 | Triclinic                  |
| Space group                                                    | <i>P</i> -1                |
| <i>a</i> (Å)                                                   | 10.2745(3)                 |
| <i>b</i> (Å)                                                   | 11.2321(4)                 |
| <i>c</i> (Å)                                                   | 11.9901(4)                 |
| $\alpha$ (°)                                                   | 74.880(2)                  |
| $\beta$ (°)                                                    | 77.193(2)                  |
| $\gamma$ (°)                                                   | 86.947(2)                  |
| <i>V</i> (Å <sup>3</sup> )                                     | 1302.56(8)                 |
| <i>Z</i>                                                       | 1                          |
| <i>D</i> <sub>calc</sub> (gcm <sup>-3</sup> )                  | 2.773                      |
| <i>F</i> (000)                                                 | 968.0                      |
| <i>R</i> <sub>int</sub>                                        | 0.0873                     |
| GOF on <i>F</i> <sup>2</sup>                                   | 1.035                      |
| <i>R</i> <sub>1</sub> <sup>a</sup> [ <i>I</i> >2δ( <i>I</i> )] | 0.0757                     |
| <i>wR</i> <sub>2</sub> <sup>b</sup> (all data)                 | 0.2195                     |

<sup>a</sup>  $R_1 = \sum ||F_o| - |F_c|| / \sum |F_o|$ . <sup>b</sup>  $wR_2 = [\sum [w(F_o^2 - F_c^2)^2] / \sum [w(F_o^2)^2]]^{1/2}$ , where  $w = 1/[\sigma^2(F_o)^2 + (aP)^2 + bP]$  and  $P = (F_o^2 + 2F_c^2)/3$ .
